# Supplementary material for: Therapeutic ACPA inhibits NET formation: a potential therapy for neutrophil-mediated inflammatory diseases
Source: PubMed Central journal article supplement (PMC8166830; doi:10.1038/s41423-020-0381-3), 2020-03-20
Supplement: 41423_2020_381_MOESM1_ESM.pdf [file 41423_2020_381_MOESM1_ESM.pdf]

1 **Supplementary Figures**

2 **a**

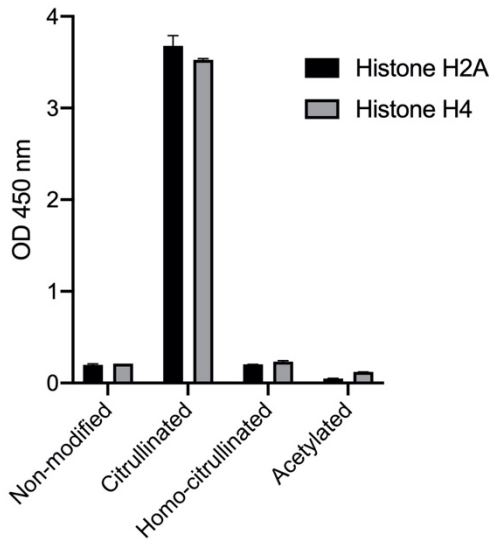

**b**

| Non-modified       |                                                                              |
|--------------------|------------------------------------------------------------------------------|
| H2A                | S G R G K Q G G K A R A K (biotin)                                           |
| H4                 | S G R G K G G K G L G K K (biotin)                                           |
| Citrullinated      |                                                                              |
| H2A                | S G R (Cit) G K Q G G K A R A K (biotin)                                     |
| H4                 | S G R (Cit) G K G G K G L G K K (biotin)                                     |
| Homo-citrullinated |                                                                              |
| H2A                | S G R G K (homoCit) Q G G K A R A K (biotin)                                 |
| H4                 | S G R G K (homoCit) G G K G L G K K (Biotin)                                 |
| Acetylated         |                                                                              |
| H2A                | S G R G K (Ac) Q G G K A R A K A K S R S S R A G G K (Biotin)                |
| H4                 | S G R G K (Ac) G G K (Ac) G L G K (Ac) G G A K (Ac) R H R K V G G K (Biotin) |

12 **Supplementary Figure 1** tACPA specifically binds to citrullinated N-terminal histone H2A and H4 peptides.

13 (a) Non-modified, citrullinated, homo-citrullinated, and acetylated N-terminal histone H2A and H4 peptides

14 (100 ng/well) were used to test hz-tACPA (10 µg/ml) binding ( $n = 2$ ). Results depicted as means  $\pm$  SEM. (b)

15 Peptide sequences used in the ELISA.

16

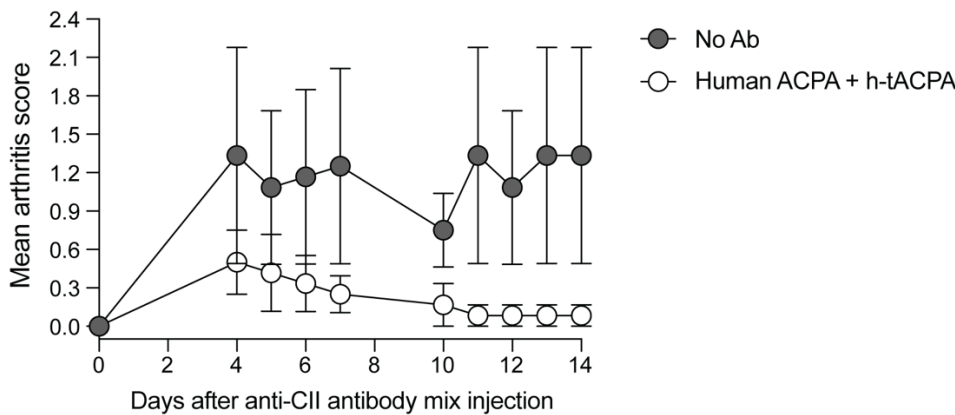

17

18 **Supplementary Figure 2** tACPA is able to perform its therapeutic activity in the presence of human ACPA.

19 Mice were injected with a low dose (1.6 mg) of anti-CII antibody mix followed by LPS at day 3 to induce

20 acute inflammatory arthritis. Antibody (Ab) treatment started directly after LPS injection by administration of a

21 mix of h-tACPA (50 mg/kg) and a human ACPA (50 mg/kg), or only PBS (No Ab). Mice were terminated at

22 day 14. The mean arthritis score (MAS) of CAIA mice was evaluated for 14 days ( $n = 3$  mice per group).

23 Results depicted as means  $\pm$  SEM.

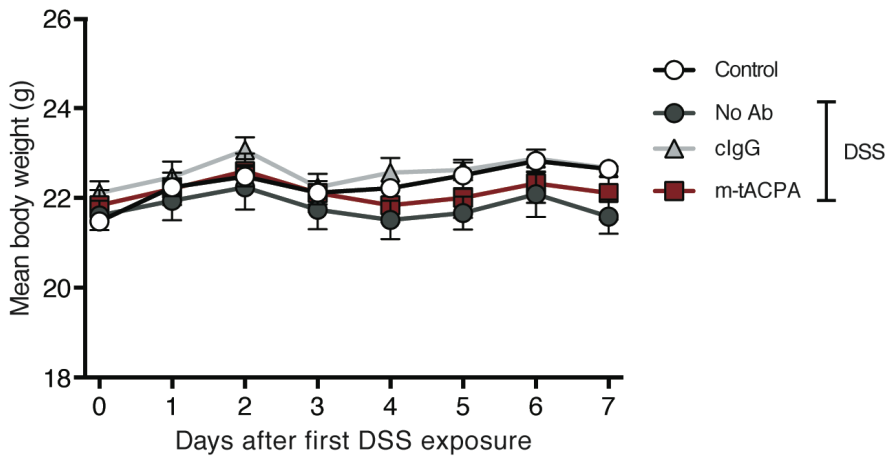

24

25 **Supplementary Figure 3** Mean body weight of DSS-induced colitis mice. Mice were challenged with normal  
 26 drinking water (Control) or drinking water containing 5% (w/v) DSS for 7 days and injected with PBS (No Ab),  
 27 50 mg/kg clgG, or m-tACPA at day 3 and 5. Mice were terminated at day 7. The mean body weight of DSS-  
 28 induced colitis mice was evaluated for 7 days ( $n = 5-8$  mice per group). Results depicted as means  $\pm$  SEM.

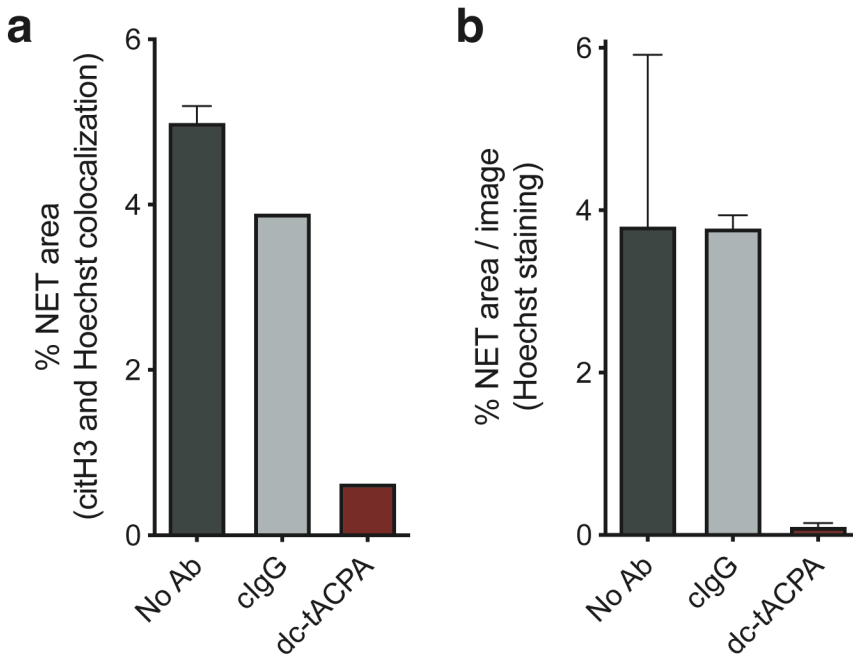

29

30 **Supplementary Figure 4** tACPA inhibits A23187-induced NET formation in mouse BM-derived neutrophils  
 31 *in vitro*. BM-derived mouse neutrophils were stimulated with A23187 in the absence (No Ab) or presence of  
 32 25  $\mu$ g/ml dc-tACPA or clgG. Quantification of NETs was performed with either (a) colocalization of citH3 and  
 33 Hoechst ( $n = 1-2$ ) or (b) Hoechst alone ( $n = 2$ ). Results depicted as means  $\pm$  SEM.

34

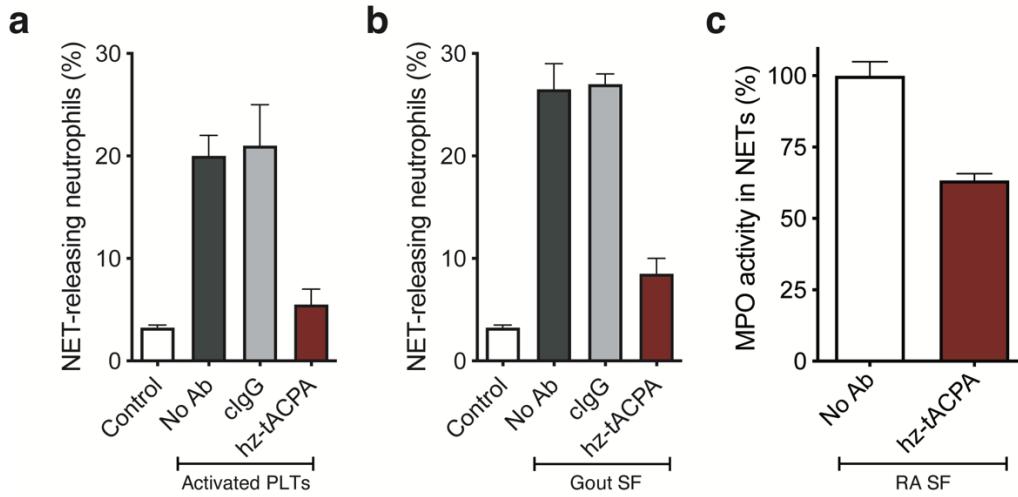

35

36 **Supplementary Figure 5** Inhibition of NET release in response to activated PLTs, gout SF, or RA SF.

37 Quantification of microscopic images from NET release induced by (a) human activated platelets (PLTs) and

38 (b) gout synovial fluid (SF) without antibody treatment (No Ab) or in the presence of 25 µg/ml clgG or hz-

39 tACPA ( $n = 2$ ). Non-stimulated neutrophils (Control) were used to set the background of NET release. The

40 percentage of NET-releasing cells was determined by examining 200 neutrophils. (c) Neutrophils from

41 healthy volunteers (HV) were stimulated with 2,5% RA SF from a CCP+ patient in the absence (No Ab) or

42 presence of 25 µg/ml hz-tACPA. MPO activity in NETs was measured ( $n = 1$ ). The mean of No Ab was set at

43 100% to calculate the percentages. Results depicted as means  $\pm$  SEM.

44

45

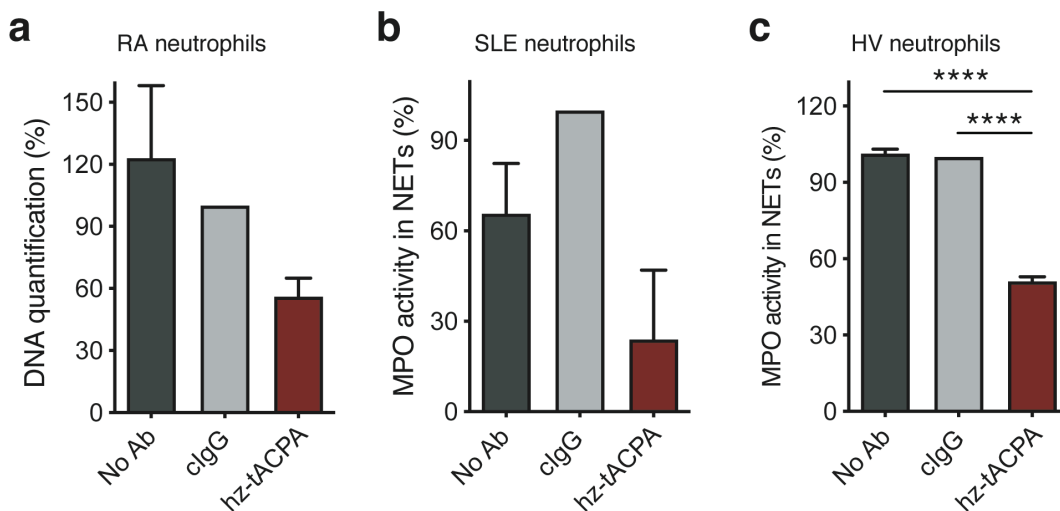

46

47 **Supplementary Figure 6** Inhibition of NET release in neutrophils from healthy volunteers (HVs), and RA and

48 SLE patients. Neutrophils from HVs, and RA and SLE patients were stimulated with 25 µM A23187 in the

49 absence (No Ab) or presence of 25 µg/ml clgG or tACPA. NET release in (a) RA and (b) SLE neutrophils

50 was inhibited with hz-tACPA, while NET release in (c) HV neutrophils was inhibited with different tACPA

51 molecules, including m-tACPA, ch-tACPA, hz-tACPA, and dc-tACPA. The presence of DNA (a) or the activity

52 of MPO in NETs (**b** and **c**) was measured ( $n = 2$  for RA,  $n = 3$  for SLE, and  $n = 109$  for HV). Results depicted  
53 as means  $\pm$  SEM. The mean of clgG was set at 100% in each individual experiment to calculate the  
54 percentages. \*\*\*\* $P < 0.0001$  using one-way ANOVA with Tukey's multiple comparisons test.  
55

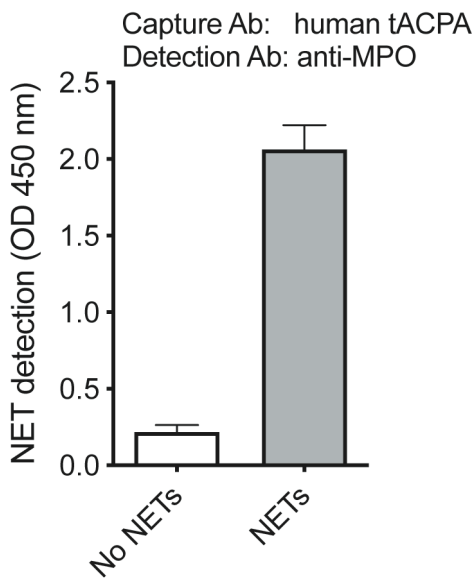

56  
57 **Supplementary Figure 7** tACPA binds to NETs in a sandwich ELISA. Supernatant of non-stimulated  
58 neutrophils (No NETs) or A23187-triggered neutrophils (NETs) from healthy volunteers were isolated and  
59 used for a sandwich ELISA to confirm the binding of tACPA to NETs. hz-tACPA (25  $\mu\text{g/ml}$ ) was coated onto  
60 an ELISA plate to capture NETs from the supernatant. Subsequently, NETs were detected with a mouse  
61 anti-MPO antibody (1  $\mu\text{g/ml}$ ) followed by a secondary rabbit anti-mouse-HRP antibody (0.65  $\mu\text{g/ml}$ ) ( $n = 2$ ).  
62 Results depicted as means  $\pm$  SEM.  
63

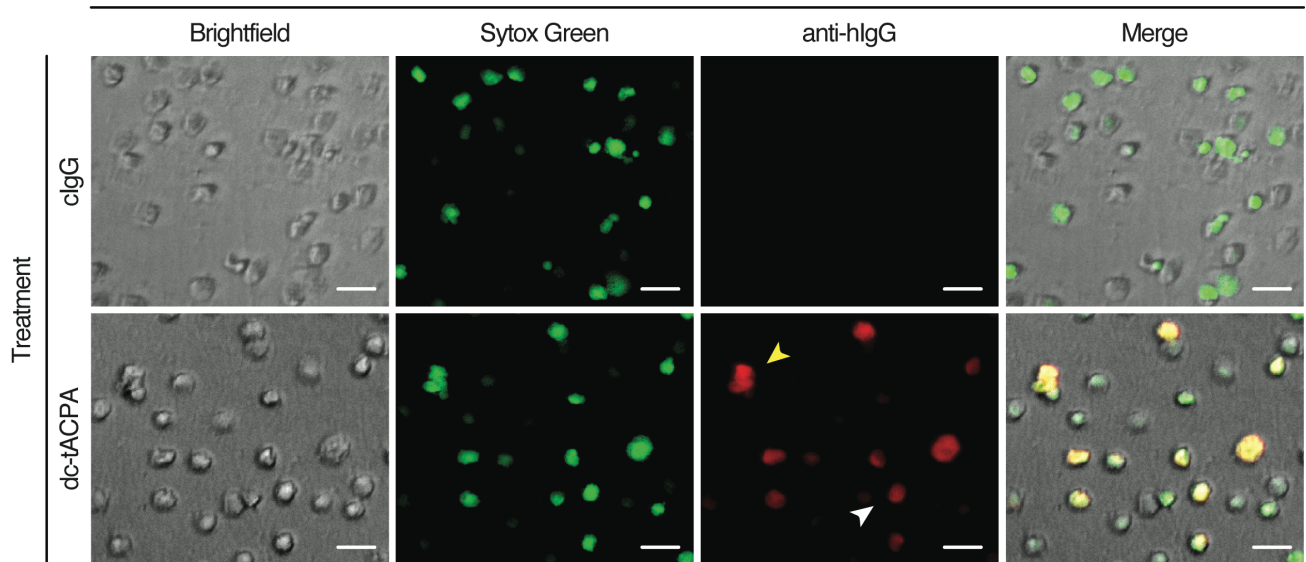

64

65 **Supplementary Figure 8** tACPA binds to mouse (pre-)NETs *in vitro*. BM-derived mouse neutrophils were  
66 stimulated with A23187 in the absence (No Ab) or presence of 25  $\mu\text{g/ml}$  dc-tACPA or clgG. Representative  
67 images of dc-tACPA binding to pre-NETs (white arrowhead) as well as expelled NETs (yellow arrowhead)  
68 visualized with transmitted white light (Brightfield), Sytox Green, and an anti-hlgG-TRITC antibody. Scale  
69 bars: 20  $\mu\text{m}$ .

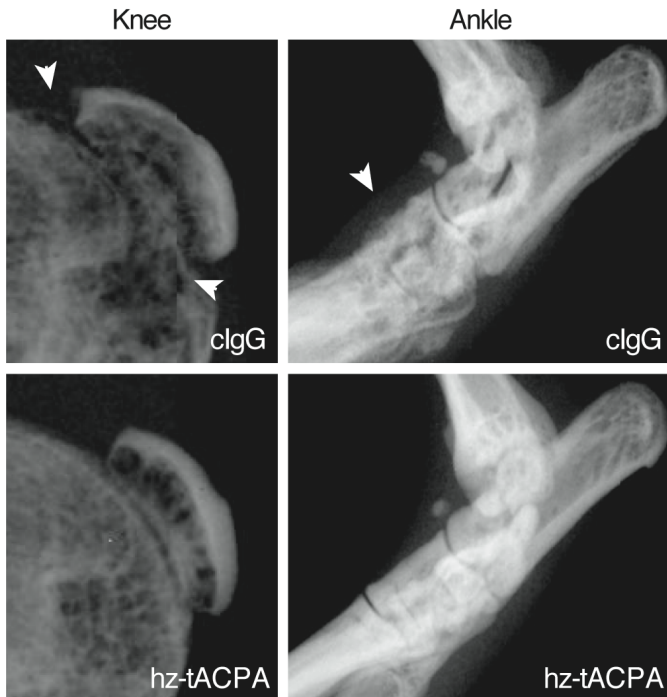

70

71 **Supplementary Figure 9** X-ray of knees and ankles from CIA mice. To induce chronic IA, mice were  
72 injected day 0 and 21 with CII. Therapeutic treatment includes four injections with tapered dosing regimens  
73 of 50/50/50/50 mg/kg clgG or 50/50/50/15 mg/kg hz-tACPA, and started after onset of the disease (between  
74 day 21-28) when the MAS was  $\geq 0.75$ . Representative X-ray images from knees and ankles of clgG- and hz-  
75 tACPA-treated mice at day 14 after the first antibody injection. Bone erosion (white arrowheads) was only  
76 observed in the joints of clgG-treated mice.

77

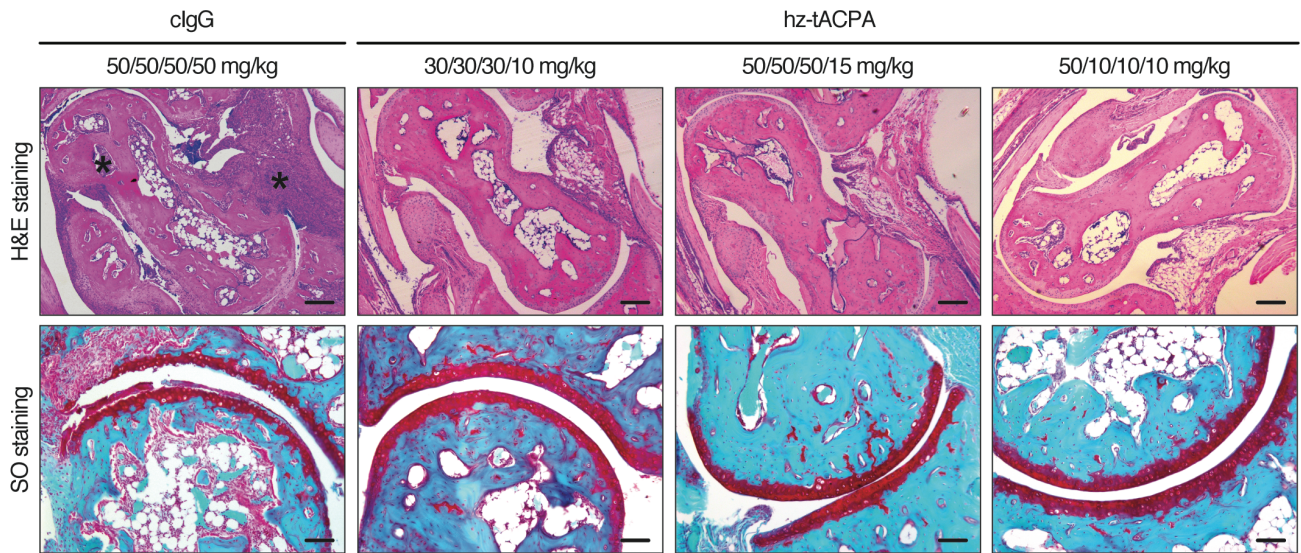

78

79

**Supplementary Figure 10** H&E and SO staining of ankle joints from CIA mice. To induce chronic IA, mice were injected on day 0 and on day 21 with CII. Therapeutic treatment includes four injections with tapered dosing regimens of 50/50/50/50 mg/kg clgG or hz-tACPA (30/30/30/10, 50/50/50/15, or 50/10/10/10 mg/kg), and started after onset of the disease (between day 21-28) when the MAS was  $\geq 0.75$ . Images represent H&E (upper panel) and SO (lower panel) staining of ankle joints from clgG- and hz-tACPA-treated mice at day 14 after the first antibody injection. Inflammatory cell influx (asterisks) was only observed in the joints of clgG-treated mice. Scale bars: 100  $\mu\text{m}$ .

86

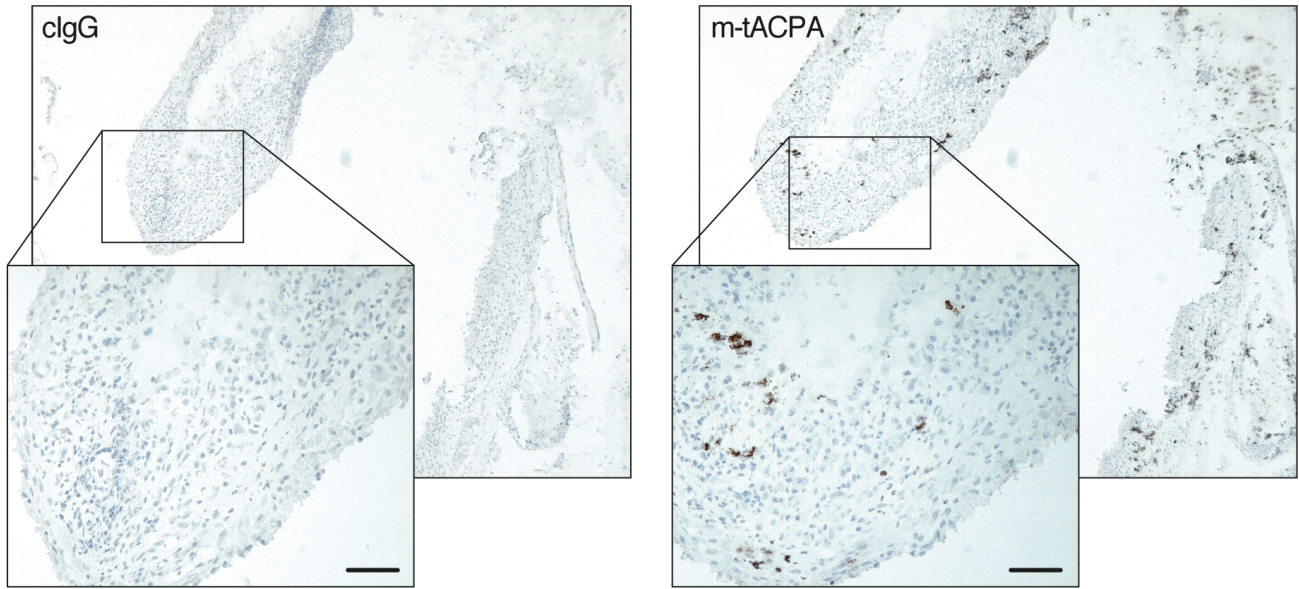

87

88

89

90

91

**Supplementary Figure 11** Binding of tACPA to human RA synovial tissue. Representative images from human RA synovial tissue stained with 2  $\mu\text{g/ml}$  clgG or 0.125  $\mu\text{g/ml}$  m-tACPA followed by an H&E staining. Tissue was collected during joint replacement surgery. Neutrophils and neutrophilic remnants were positively stained for tACPA. Scale bars: 100  $\mu\text{m}$ .



92 **Supplementary Tables**

93

| Macroscopical signs of inflammation     | Score     |    |
|-----------------------------------------|-----------|----|
| 1-2 Swollen toes                        | 0.25      | 94 |
| 3-4 Swollen toes                        | 0.50      |    |
| Slightly swollen footpad or ankle       | 0.50-0.75 | 95 |
| Swollen footpad or ankle                | 1.00      |    |
| Swollen toes + slightly swollen footpad | 1.25      | 96 |
| Swollen toes + swollen footpad          | 1.5       |    |
| Swollen footpad + swollen ankle         | 2.00      | 97 |
|                                         |           |    |
|                                         |           | 98 |
|                                         |           |    |

99

100 **Supplementary Table 1** Scoring system for macroscopical signs of inflammation in CAIA and CIA mice.

101 CAIA and CIA mice were considered to have arthritis when significant changes of redness and/or swelling

102 were noted in the digits or in other parts of the paws. Joint inflammation in each paw was scored visually

103 using a scale of 0-2 per paw (0 = not inflamed, 1 = mild inflammation, 1.5 = marked inflammation, and 2 =

104 severe inflammation) with a maximal score of 8 per animal.

105

106

| # | Name             | Histone | Modification                   | Peptide sequence                        |     |
|---|------------------|---------|--------------------------------|-----------------------------------------|-----|
| 1 | H2A + H4         | H2A     | No modification                | SGRGKQGGKARA                            | 107 |
|   |                  | H4      | No modification                | SGRGKGGKGLGKGGAKRHRKVLR                 |     |
| 2 | citH2A           | H2A     | Citrullination (R3)            | SGR(cit)GKQGGKARA                       | 108 |
| 3 | citH4            | H4      | Citrullination (R3)            | SGR(cit)GKGGKGLGKGGAKRHRKVLR            | 109 |
| 4 | phosH2A + phosH4 | H2A     | Phosphorylation (S1)           | S(phos)GRGKQGGKARA                      | 110 |
|   |                  | H4      | Phosphorylation (S1)           | S(phos)GRGKGGKGLGKGGAKRHRKVLR           |     |
| 5 | acH2A + acH4     | H2A     | Acetylation (K5, K9)           | SGRGK(ac)QGGK(ac)ARA                    | 111 |
|   |                  | H4      | Acetylation (K5, K8, K12, K16) | SGRGK(ac)GGK(ac)GLGK(ac)GGAK(ac)RHRKVLR |     |
| 6 | sdmH4 + admH4    | H4      | Symmetric methylation (R3)     | SGR(sdm)GKGGKGLGKGGAKRHRKVLR            | 112 |
|   |                  | H4      | Asymmetric methylation (R3)    | SGR(adm)GKGGKGLGKGGAKRHRKVLR            |     |

113

114 **Supplementary Table 2** H2A and H4 peptides used for immunization of CAIA mice. To determine the

115 potential of citrullinated H2A and H4 as therapeutic target in a CAIA mouse model of RA, different N-terminal

116 post-translationally-modified H2A and H4 peptides were used to immunize DBA/J1 mice prior to arthritis

117 induction with an anti-CII antibody mix.

118

| H2A + H4-immunized mice |                |               |                              | citH4-immunized mice |                   |               |                              |
|-------------------------|----------------|---------------|------------------------------|----------------------|-------------------|---------------|------------------------------|
| Mice                    | Binding to H2A | Binding to H4 | Selected for CAIA experiment | Mice                 | Binding to citH2A | Binding to H4 | Selected for CAIA experiment |
| 1                       | 0.139          | 0.112         |                              | 1                    | 0.228             | 0.270         |                              |
| 2                       | 0.876          | 0.641         | X                            | 2                    | 0.151             | 0.372         |                              |
| 3                       | 0.090          | 0.070         |                              | 3                    | 0.228             | 0.082         | X                            |
| 4                       | 1.036          | 0.433         | X                            | 4                    | 0.156             | 0.074         | X                            |
| 5                       | 0.894          | 0.346         | X                            | 5                    | 0.431             | 0.118         | X                            |

  

| citH2A-immunized mice |                   |                |                              | phosH2A + phosH4-immunized mice |                    |                |                              |
|-----------------------|-------------------|----------------|------------------------------|---------------------------------|--------------------|----------------|------------------------------|
| Mice                  | Binding to citH2A | Binding to H2A | Selected for CAIA experiment | Mice                            | Binding to phosH2A | Binding to H2A | Selected for CAIA experiment |
| 1                     | 0.193             | 0.131          |                              | 1                               | 0.120              | 0.094          |                              |
| 2                     | 0.143             | 0.084          |                              | 2                               | 0.302              | 0.088          | X                            |
| 3                     | 0.130             | 0.073          |                              | 3                               | 0.128              | 0.112          |                              |
| 4                     | 1.363             | 0.29           | X                            | 4                               | 0.289              | 0.099          | X                            |
| 5                     | 0.544             | 0.134          |                              | 5                               | 0.457              | 0.086          | X                            |
| 6                     | 0.151             | 0.172          |                              | 6                               | 0.097              | 0.093          |                              |
| 7                     | 0.099             | 0.086          |                              | 7                               | 0.048              | 0.093          |                              |
| 8                     | 1.492             | 0.639          | X                            | 8                               | 0.700              | 0.104          | X                            |
| 9                     | 0.449             | 0.675          |                              | 9                               | 0.414              | 0.098          | X                            |
| 10                    | 2.291             | 0.729          | X                            |                                 |                    |                |                              |
| 11                    | 2.362             | 0.491          | X                            |                                 |                    |                |                              |

  

| acH2A + acH4-immunized mice |                  |                |                              | sdmH4 + admH4-immunized mice |                  |                  |               |                              |
|-----------------------------|------------------|----------------|------------------------------|------------------------------|------------------|------------------|---------------|------------------------------|
| Mice                        | Binding to acH2A | Binding to H2A | Selected for CAIA experiment | Mice                         | Binding to admH4 | Binding to sdmH4 | Binding to H4 | Selected for CAIA experiment |
| 1                           | 1.211            | 0.992          |                              | 1                            | 0.394            | 0.429            | 0.472         |                              |
| 2                           | 1.213            | 0.330          | X                            | 2                            | 0.771            | 0.812            | 0.073         | X                            |
| 3                           | 1.205            | 0.151          | X                            | 3                            | 0.105            | 0.129            | 0.101         |                              |
| 4                           | 1.043            | 0.152          | X                            | 4                            | 1.282            | 1.393            | 0.133         | X                            |
| 5                           | 1.349            | 0.182          | X                            | 5                            | 0.176            | 0.242            | 0.059         |                              |
| 6                           | 1.376            | 0.117          | X                            | 6                            | 0.953            | 1.365            | 0.315         | X                            |
| 7                           | 1.332            | 0.112          | X                            | 7                            | 0.145            | 0.166            | 0.176         |                              |
| 8                           | 0.135            | 0.128          |                              | 8                            | 0.531            | 0.573            | 0.230         | X                            |
|                             |                  |                |                              | 9                            | 0.654            | 0.749            | 0.862         |                              |

119

120 **Supplementary Table 3** Peptide-specific immune response in immunized DBA/J1 mice prior to arthritis  
121 induction. To determine the potency of citrullinated H2A (citH2A) and H4 (citH4) as therapeutic target in a  
122 CAIA mouse model of IA, different N-terminal post-translationally-modified H2A and H4 peptides were used  
123 to immunize DBA/J1 mice prior to arthritis induction with an anti-CII antibody mix. Peptide-specific immune  
124 response was determined in serum (1:100 diluted in PBS) using an ELISA. Since the first 5 amino acids of  
125 the N-terminus of H2A and H4 are identical, they can both be used to monitor an anti-citrulline response to  
126 both citH2A and citH4. Mice that developed a specific immune response against the modified peptides, but  
127 not the non-modified peptides, were selected for inclusion in the CAIA experiment. Results depicted as OD  
128 (450 nm) measurements.

129

130

131

| Score | Severity of inflammation | Layers involved                      | Epithelial damage          | Extent     |
|-------|--------------------------|--------------------------------------|----------------------------|------------|
| 0     | None                     | No inflammation                      | Intact epithelium          | No lesions |
| 1     | Mild                     | Inflammation in mucosa               | Disruption of architecture | Punctuate  |
| 2     | Moderate                 | Inflammation in mucosa and submucosa | Ulceration                 | Multifocal |
| 3     | Severe                   | Transmural inflammation              | Ulceration                 | Diffuse    |

135

136 **Supplementary Table 4** Scoring system for tissue damage in the proximal colon of DSS-induced colitis

137 mice. After 7 days of DSS-induced colitis, the proximal colons were removed. Histological Periodic Acid

138 Schiff-stained tissue sections of the proximal colon were scored for inflammation in the mucosa and

139 submucosa, and transmural inflammation with a maximal score of 3 per animal.

140

141

| Organ                                       | Parameters                                | Maximum score |
|---------------------------------------------|-------------------------------------------|---------------|
| Lung                                        | Oedema (0-3)                              | 15            |
|                                             | Congestion (0-3)                          |               |
|                                             | Hemorrhage (0-3)                          |               |
|                                             | Thickening of the septa (0-3)             |               |
|                                             | Interstitial leukocyte infiltration (0-3) |               |
| Liver                                       | Apoptotic bodies (0-1)                    | 22            |
|                                             | Enlarged sinusoids (0-3)                  |               |
|                                             | Hepatocyte necrosis (0-3)                 |               |
|                                             | Kupffer cell hyperplasia (0-3)            |               |
|                                             | Kupffer cell hypertrophy (0-3)            |               |
|                                             | Luminal leukocyte infiltration (0-3)      |               |
|                                             | Loss of glycogen within hepatocyte (0-3)  |               |
| Increased volume of endothelial cells (0-3) |                                           |               |
| Kidney                                      | Erythrocyturia (0-1)                      | 4             |
|                                             | Tubular damage (0-3)                      |               |
| Spleen                                      | Congestion (0-3)                          | 7             |
|                                             | Tingible bodies (0-1)                     |               |
|                                             | Accumulation of neutrophils (0-3)         |               |

142

143

144

145

146

147

148

149

150

151 **Supplementary Table 5** Scoring system for tissue damage in the lung, liver, kidney, and spleen in LPS-

152 induced sepsis mice. After 4 days of LPS-induced sepsis, lung, liver, kidney, and spleen were removed.

153 Histological H&E-stained lung and liver tissue sections, Periodic Acid Schiff (PAS)-stained kidney sections,

154 and PAS-diastase-stained liver sections were scored for specific parameters as shown in the table, with

155 maximal scores of 15, 22, 4, and 7 for lung, liver, kidney, and spleen, respectively.

156 **Materials and Methods**

157 **ELISA to test tACPA cross-reactivity**

158 96-well plates (Greiner Bio-One, 655061) were coated with 100 ng/well neutravidin (Invitrogen, 31000) in  
159 PBS overnight at 4°C. Between every following step, the wells were washed with PBS containing 0.05%  
160 Tween 20 (PBS/Tween). After washing, the plates were blocked with 1% BSA (Sigma Aldrich, A3912) in  
161 PBS/Tween (BSA/PBS/Tween) for 60 min at room temperature, after which 100 ng/well non-modified,  
162 citrullinated, homo-citrullinated, or acetylated H2A or H4 peptides in BSA/PBS/Tween were coated for 60 min  
163 at 37°C. Subsequently, 10 µg/ml hz-tACPA in BSA/PBS/Tween was added to the wells and incubated for 60  
164 min at room temperature. This step was followed by adding HRP-conjugated goat anti-human IgG (Southern  
165 Biotech, 2040-05; 4000x diluted) and after 60 min incubation at room temperature, wells were washed three  
166 times with PBS/Tween followed by three washes with PBS. The reaction was visualized with 100 µl TMB  
167 (Thermo Fisher, SB02) and subsequently stopped with 50 µl 2M H<sub>2</sub>SO<sub>4</sub> after 5 min. The absorbance was  
168 measured at 450 nm using the Tecan Infinite F50.
